# Supplementary material
Source: PubMed Central journal article supplement (PMC7437665)
Supplement: media-1.pdf [file media-1.pdf]

1 **SUPPLEMENTARY INFORMATION for Schoof *et al.***

2  
3 **MATERIALS AND METHODS**

4 **Expression and purification of SARS-CoV-2 Spike, RBD, and ACE2.**

5 We used a previously described construct to express and purify the pre-fusion SARS-CoV-2  
6 Spike ectodomain (Spike\*) (15). ExpiCHO or Expi293T cells (ThermoFisher) were transfected  
7 with the Spike\* construct per the manufacturer's instructions for the MaxTiter protocol and  
8 harvested between 3-9 days after transfection. Clarified cell culture supernatant was loaded  
9 onto Ni-Excel beads (Cytiva) followed by extensive washes in 20 mM HEPES pH 8.0, 200 mM  
10 sodium chloride, and 10 mM imidazole and elution in the same buffer supplemented with 500  
11 mM imidazole. Spike\* was concentrated using a 100 kDa MWCO spin concentrator (Millipore)  
12 and further purified by size exclusion chromatography over a Superose 6 Increase 10/300  
13 column (GE Healthcare) in 20 mM HEPES pH 8.0 and 200 mM sodium chloride. All purification  
14 steps were performed at room temperature. The resulting fractions for trimeric Spike\* were  
15 pooled and either used directly for cryo-EM studies or concentrated and flash frozen in liquid  
16 nitrogen with 15% glycerol for other biochemical studies.

17  
18 We used a previously described construct to express and purify the SARS-CoV-2 Receptor  
19 binding domain (RBD) (44). Expi293T cells (ThermoFisher) were transfected with the RBD  
20 construct per the manufacturer's instructions and harvested between 3-6 days after transfection.  
21 Clarified cell culture supernatant was loaded onto Ni-Excel beads (Cytiva) or a His-Trap Excel  
22 column (GE Healthcare) followed by washes in 20 mM HEPES pH 8.0, 200 mM sodium  
23 chloride, and 10 mM imidazole and elution using the same buffer supplemented with 500 mM  
24 imidazole. RBD was concentrated using a 30 kDa MWCO spin concentrator (Millipore) and  
25 further purified by size exclusion chromatography over a Superdex 200 Increase 10/300 GL  
26 column (GE Healthcare) in 20 mM HEPES pH 8.0 and 200 mM sodium chloride. The resulting  
27 fractions were pooled, concentrated, and flash frozen in liquid nitrogen with 10% glycerol.

28  
29 For biochemical and yeast display experiments, Spike\* and RBD were labeled with freshly  
30 prepared stocks of Alexa 647-NHS, Alexa 488-NHS, or Biotin-NHS (ThermoFisher) with a 5-fold  
31 stoichiometry for 1 hour at room temperature followed by quenching of NHS with 10 mM Tris pH  
32 8.0 for 60 minutes. Labeled proteins were further purified by size exclusion chromatography,  
33 concentrated using a spin concentrator (Millipore), and flash frozen in liquid nitrogen with 10-  
34 15% glycerol.

35  
36 We used an ACE2-ECD (18-614) Fc fusion expression plasmid to express and purify Fc tagged  
37 ACE2-ECD (45). Expi293T cells (ThermoFisher) were transfected with the ACE2-Fc construct  
38 per the manufacturer's instructions and harvested between 5-7 days after transfection. Clarified  
39 cell culture supernatant was loaded onto a MabSelect Pure 1 mL Column (GE Healthcare).  
40 Column was washed with Buffer A (20 mM HEPES pH 7.5, 150 mM NaCl) and protein was  
41 eluted with Buffer B (100 mM Sodium Citrate pH 3.0, 150 mM NaCl) into a deep well block  
42 containing 1 M HEPES pH 7.5 to neutralize the acidic elution. ACE2-Fc was concentrated using  
43 a 30 kDa MWCO spin concentrator (Millipore) and further purified by size exclusion  
44 chromatography over a Superdex 200 Increase 10/300 GL column (GE Healthcare) in SEC  
45 Buffer (20 mM HEPES pH 7.5, 150 mM NaCl, 5% v/v Glycerol). The resulting fractions were  
46 pooled, concentrated, and flash frozen in liquid nitrogen. To obtain monomeric ACE2, 1:50  
47 (w/w) His-tagged TEV protease was added to ACE2-Fc and incubated at 4 °C overnight. This  
48 mixture was then purified by size exclusion chromatography in SEC Buffer. Monomeric ACE2  
49 fractions were pooled and washed with His-resin (1 mL of 50% slurry) to remove excess TEV.  
50 The resulting supernatant was pooled, concentrated, and flash frozen in liquid nitrogen.

## 51 52 **Identification of anti SARS-CoV2 Spike nanobodies**

53 To identify nanobodies against the SARS-CoV-2 Spike ECD, we used a yeast surface displayed  
54 library of synthetic nanobody sequences that recapitulate amino acid position specific-variation  
55 in natural llama immunological repertoires. This library encodes a diversity of  $>2 \times 10^9$  variants,  
56 and uses a synthetic stalk sequence for nanobody display, as described previously in a modified  
57 vector encoding nourseothricin (NTC) resistance (46). For the first round of selection,  $2 \times 10^{10}$   
58 yeast induced in YPG (Yeast Extract-Peptone-Galactose) supplemented with NTC were washed  
59 repeatedly in selection buffer (20 mM HEPES, pH 7.5, 150 mM sodium chloride, 0.1% (w/v) low  
60 biotin bovine serum albumin, BSA) and finally resuspended in 10 mL of selection buffer  
61 containing 200 nM biotinylated-Spike\*. Yeast were incubated for 30 minutes at 25 °C, then  
62 washed repeatedly in cold selection buffer, and finally resuspended in 10 mL of cold selection  
63 buffer containing 200  $\mu$ L of Miltenyi anti-Streptavidin microbeads. After 30 minutes of incubation  
64 at 4 °C, yeast were again washed with cold selection buffer. Spike\* binding yeast were captured  
65 on a Miltenyi MACS LS column and recovered in YPD (Yeast Extract-Peptone-Dextrose)  
66 medium supplemented with NTC.

67

68 For round 2,  $4 \times 10^8$  induced yeast from Round 1 were incubated with 100 nM Spike\* labeled with  
69 Alexa647 in 1 mL of selection buffer for 1 hr at 25 °C. After extensive washes with cold selection  
70 buffer, Spike\* binding yeast were isolated by fluorescence activated cell sorting (FACS) on a  
71 Sony SH800 instrument. A similar approach was used for round 3, with substitution of 10 nM  
72 Spike\* labeled with Alexa647. Post round 3 yeast were plated on YPD+NTC solid media and  
73 768 individual colonies were induced with YPG+NTC media in 2 mL deep well plates. Each  
74 individual clone was tested for binding to 4 nM Spike\*-Alexa488 by flow cytometry on a  
75 Beckman Coulter Cytoflex. To identify nanobodies that disrupt Spike-ACE2 interactions, Spike\*  
76 binding was repeated in the presence of 0.5-1  $\mu$ M ACE2-Fc. Out of 768 clones, we identified 21  
77 that strongly bind Spike\* and are competitive with ACE2 (Supplementary Table 3).

78

### 79 **Expression and purification of nanobodies**

80 Nanobody sequences were cloned into the pET26-b(+) expression vector using In-Fusion HD  
81 cloning (Takara Bio), transformed into BL21(DE3) *E. coli*, grown in Terrific Broth at 37 °C until  
82 OD 0.7-0.8, followed by gene induction using 1 mM IPTG for 18-22 hours at 25°C. *E. Coli* were  
83 harvested and resuspended in SET Buffer (200 mM Tris, pH 8.0, 500 mM sucrose, 0.5 mM  
84 EDTA, 1X cOmplete protease inhibitor (Roche)) for 30 minutes at 25 °C before a 45 minute  
85 osmotic shock with a two-fold volume addition of water. NaCl, MgCl<sub>2</sub>, and imidazole were  
86 added to the lysate to 150 mM, 2 mM, and 40 mM respectively before centrifugation at 17-  
87 20,000xg for 15 minutes to separate cell debris from the periplasmic fraction. For every liter of  
88 bacterial culture, the periplasmic fraction was then incubated with 4 mL of 50% HisPur Ni-NTA  
89 resin (Thermo Scientific) which had been equilibrated in Nickel Wash Buffer (20 mM HEPES,  
90 pH 7.5, 150 mM NaCl, 40 mM imidazole). This mixture was incubated for 1 hr with rotation at  
91 RT before centrifugation at 50xg to collect the resin. The resin was then washed with 5 volumes  
92 of Nickel Wash buffer 3 times, each time using centrifugation to remove excess wash buffer.  
93 Bound proteins were then eluted using three washes with Elution Buffer (20 mM HEPES, pH  
94 7.5, 150 mM NaCl, 500 mM imidazole). The eluted protein was concentrated using a 3.5 kDa  
95 MWCO centrifugal filter unit (Amicon) before injection onto a Superdex 200 Increase 10/300 GL  
96 column equilibrated with 20 mM HEPES, pH 7.5, 150 mM NaCl. Nanobody constructs were  
97 concentrated again using a 3.5k MWCO centrifugal filter unit, and flash frozen in liquid nitrogen.

98

### 99 **Affinity determination by surface plasmon resonance**

100 Nanobody (Nb) affinity determination experiments were performed on Biacore T200 and 8K  
101 instruments (Cytiva Life Sciences) by capturing the StreptagII-tagged Spike\* at 10  $\mu$ g/mL on a

102 StreptactinXT-immobilized (Iba Life Sciences) CM5 Series S sensor chip (Cytiva Life Sciences)  
103 to achieve maximum response ( $R_{max}$ ) of approximately 30 response units (RUs) upon  
104 nanobody binding. 2-fold serial dilutions of purified nanobody from 1  $\mu$ M to 31.25 nM (for  
105 monovalent constructs) or from 50 nM to 1.56 nM (for affinity matured and multimeric  
106 constructs) were flowed over the captured Spike\* surface at 30  $\mu$ L/minute for 60 seconds  
107 followed by 600 seconds of dissociation flow. Following each cycle, the chip surface was  
108 regenerated with 3 M guanidine hydrochloride.

109  
110 Separately, biotinylated SARS-CoV-2 RBD at 8  $\mu$ g/mL was loaded onto a preconditioned Series  
111 S Sensor Chip CAP chip (Cytiva Life Sciences) to achieve an  $R_{max}$  of approximately 60 RUs  
112 upon nanobody binding. 2-fold serial dilutions in the same running buffer and sample series  
113 (parent or affinity matured clone) as the Spike\* runs were flowed over the RBD surface at 30  
114  $\mu$ L/minute for 60 seconds followed by 600 seconds of dissociation flow. Chip surface  
115 regeneration was performed with a guanidine hydrochloride/sodium hydroxide solution.

116  
117 The resulting sensorgrams for all monovalent clones were fit to a 1:1 Langmuir binding model  
118 using the Biacore Insight Evaluation Software (Cytiva Life Sciences) or the  
119 association/dissociation model in GraphPad Prism 8.0. For determination of kinetic parameters  
120 for Nb6-bi and Nb6-tri binding, the dissociation phase was fit to a biexponential decay  
121 constrained to two dissociation rate constants shared between each concentration. The  
122 association phase was fit separately using an association kinetics model simultaneously fitting  
123 the association rate constant for each concentration.

124  
125 For nanobody competition experiments, Spike\* was loaded onto a StreptactinXT-immobilized  
126 CM5 sensor chip as previously described. As in the kinetics experiments, the primary nanobody  
127 was flowed over the captured Spike\* surface for 60 seconds at 30  $\mu$ L/minute to achieve  
128 saturation. Immediately following this, a second injection of a mixture of primary and variable  
129 nanobody at the same concentration as in the primary injection was performed.

130  
131 **ACE2 cellular surface binding competition assays**  
132 A dilution series of nanobody was generated in PBE (PBS + 0.5% (w/v) BSA + 2 mM EDTA and  
133 mixed with Spike\*-Alexa647 or RBD-Alexa647. ACE2 expressing HEK293T cells were  
134 dissociated with TrypLE Express (ThermoFisher) and resuspended in PBE (20). The cells were  
135 mixed with the Spike\*-nanobody solution and incubated for 45 minutes, washed in PBE, and

136 then resuspended in PBE. Cell surface Alexa647 fluorescence intensity was assessed on an  
137 Attune Flow Cytometer (ThermoFisher).

138

### 139 **Affinity maturation of Nb6**

140 A site saturation mutagenesis library of Nb6 was generated by assembly PCR of overlapping  
141 oligonucleotides encoding the Nb6 sequence. Individual oligos for each position in CDR1,  
142 CDR2, and CDR3 were designed with the degenerate “NNK” codon. The assembled gene  
143 product was amplified with oligonucleotides with overlapping ends to enable homologous  
144 recombination with the yeast surface display vector as previously described and purified with  
145 standard silica-based chromatography (46). The resulting insert DNA was transformed into  
146 *Saccharomyces cerevisiae* strain BJ5465 along with the yeast display vector pYDS2.0 to  
147 generate a library of  $2 \times 10^8$  transformants. After induction in YPD+NTC medium at 20 °C for 2  
148 days,  $2 \times 10^9$  yeast were washed in selection buffer (20 mM HEPES, pH 8.0, 150 mM sodium  
149 chloride, 0.1% (w/v) low biotin BSA) and incubated with 1 nM biotin-Spike\* for 1 hour at 25 °C.  
150 Yeast were subsequently washed in selection buffer, resuspended in 1 mL selection buffer, and  
151 incubated with 10  $\mu$ L streptavidin microbeads (Miltenyi) for 15 min. at 4 °C. Yeast were washed  
152 again with cold selection buffer and Spike\*-binding yeast were isolated by magnetic separation  
153 using an LS column (Miltenyi). Recovered yeast were grown in YPD+NTC at 37 °C and induced  
154 in YPG+NTC at 20 °C. A second round of selection was performed as above, substituting 100  
155 pM RBD-Alexa647 as the antigen. Yeast displaying high affinity clones were selected by  
156 magnetic separation using Anti-Cy5 microbeads (Miltenyi) and an LS column. Analysis of the  
157 library after the second round of selection revealed a population of clones with clear binding of  
158 10 pM RBD-Alexa647. Therefore, 96 individual clones were screened for binding to 10 pM RBD-  
159 Alexa647 by flow cytometry. Sequence analysis of eight clones that showed robust binding to  
160 10 pM RBD-Alexa647 revealed two consensus mutations, I27Y and P105Y, which were used to  
161 generate the affinity matured clone mNb6.

162

### 163 **Structures of Spike-nanobody complexes by cryo-EM**

#### 164 *Sample preparation and microscopy*

165 To prepare Spike\*-nanobody complexes, each nanobody was incubated on ice at a 3-fold molar  
166 excess to Spike\* at 2.5  $\mu$ M for 10 minutes. 3  $\mu$ L of Spike\*-nanobody complex was added to a  
167 300 mesh 1.2/1.3R Au Quantifoil grid previously glow discharged at 15 mA for 30 seconds.  
168 Blotting was performed with a blot force of 0 for 4 seconds at 4°C and 100% humidity in a FEI  
169 Vitrobot Mark IV (ThermoFisher) prior to plunge freezing into liquid ethane.

170

171 For each complex, 120-frame super-resolution movies were collected with a 3x3 image shift  
172 collection strategy at a nominal magnification of 105,000x (physical pixel size: 0.834 Å/pix) on a  
173 Titan Krios (ThermoFisher) equipped with a K3 camera and a Bioquantum energy filter (Gatan)  
174 set to a slit width of 20 eV. Collection dose rate was 8 e<sup>-</sup>/pixel/second for a total dose of 66 e<sup>-</sup>  
175 /Å<sup>2</sup>. Each collection was performed with semi-automated scripts in SerialEM (47).

176

### 177 *Image Processing*

178 For all datasets, dose fractionated super-resolution movies were motion corrected with  
179 MotionCor2 (48). Contrast transfer function determination was performed with cryoSPARC  
180 patch CTF (49). Particles were picked with a 20 Å low-pass filtered apo Spike 2D templates  
181 generated from a prior data collection.

182

183 Nb6-Spike\* and mNb6-Spike\* particles were extracted with a 384 pixel box, binned to 96 pixels  
184 and subject to single rounds of 2D and 3D classification prior to unbinning for homogenous  
185 refinement in cryoSPARC (49). Refined particles were then imported into Relion3.1 for 3D  
186 classification without alignment using the input refinement map low pass filtered to 40 Å (50).  
187 Particles in classes representing the closed conformation of Spike were imported into cisTEM  
188 and subject to autorefinement followed by local refinement within a RBD::nanobody masked  
189 region (51). Following local refinement, a new refinement package symmetrized to the C3 axis  
190 was created for a final round of local refinement without masking. Final particle counts for each  
191 map are as follows: Nb6-Open: 40,125, Nb6-Closed: 58,493, mNb6: 53,690.

192

193 Nb11-Spike\* particles were extracted with a 512 pixel box, binned to 128 pixels for multiple  
194 rounds of 3D classification as described in Figure S4. Following homogenous refinement,  
195 particles were exported to Relion3.1. Particle density roughly corresponding to RBD-nanobody  
196 complexes was retained post-particle subtraction. 3D classification without alignment was  
197 performed on the particle subtracted stacks. Particles in classes with robust RBD-nanobody  
198 density were selected, unsubtracted and refined in Relion followed by post-processing. 21,570  
199 particles contributed to the final maps. Final particle counts for each map are as follows: Nb11-  
200 Open: 21,570, Nb11-Closed: 27,611. For all maps, final local resolution estimation and GSFSC  
201 determination was carried out in cryoSPARC.

202

### 203 *Structure modeling*

204 Models of Nb6-Spike\* and mNb6-Spike\* were built using a previously determined structure of  
205 closed Spike\* (PDB: 6VXX) (14). A composite model incorporating resolved regions of the RBD  
206 was made using a previously determined X-ray crystal structure of the SARS-CoV-2 RBD (PDB:  
207 6M0J) (52). For Nb6, the beta2-adrenergic receptor nanobody Nb80 (PDB: 3P0G) was used as  
208 a template to first fit the nanobody into the cryo-EM density map for the Nb6-Spike\* complex  
209 (53). Complementarity determining loops were then truncated and rebuilt using RosettaES (54).  
210 The final structure was inspected and manually adjusted in COOT and ISOLDE, followed by real  
211 space refinement in PHENIX (55-57). The higher resolution structure of mNb6 enabled manual  
212 building of nanobody CDR loops *de novo*, and therefore the Rosetta-based approach was not  
213 used for modeling. Final models were analyzed in PHENIX, with statistics reported in  
214 Supplementary Table 1.

215

216 For models of Nb11-Spike\* complexes presented here, the closest nanobody by sequence in  
217 the PDB (beta2-adrenergic receptor Nb60, PDB ID: 5JQH) was fit by rigid-body refinement in  
218 COOT into the cryo-EM density map using only the framework regions (58). While the lower  
219 resolution of these maps precluded confident assignment of loop conformations, the overall  
220 orientation of Nb11 relative to Spike\* was well constrained, enabling accurate modeling of  
221 distances between the N- and C- termini of two Nb11 molecules bound to Spike\*.

222

### 223 **Radiolytic hydroxyl radical footprinting and mass-spectrometry of Spike\* and Nb3-Spike\***

224 Spike\* and Nb3 samples were buffer exchanged into 10 mM phosphate buffer (pH 7.4) by  
225 extensive dialysis at 25 °C. A 1.5-fold molar excess of Nb3 was added to 5 μM Spike\* and the  
226 complex was incubated for >24 hr at 25 °C. For radiolytic footprinting, protein concentrations  
227 and beam parameters were optimized using an Alexa-488 fluorophore assay (59). Apo Spike\*  
228 and Spike\*-Nb3 complex at concentrations of 1-3 μM were exposed to a synchrotron X-ray  
229 white beam at 6 timepoints between 0-50 ms at beamline 3.2.1 at the Advanced Light Source in  
230 Berkeley, CA and were quenched with 10 mM methionine amide immediately post-exposure.  
231 Glycans were removed by treatment with 5% SDS, 5 mM DTT at 95 °C for five minutes and  
232 subsequent PNGase (Promega) digestion at 37°C for 2 hours. Samples were buffer exchanged  
233 into ammonium bicarbonate (ABC) buffer (pH 8.0) using ZebaSpin columns (Thermo Fisher).  
234 Alkylation of cysteines was achieved by treatment with 8 M urea and 5 mM DTT at 37°C for 30  
235 minutes followed by an incubation with 15 mM iodoacetamide at 25 °C in the dark for 30  
236 minutes. All samples were further buffer exchanged to ABC pH 8.0 using ZebaSpin columns

237 and digested with either Trypsin/Lys-C or Glu-C (Promega) at an enzyme:protein ratio of 1:20  
238 (w/w) at 37 °C for 8 hours.

239  
240 Samples were lyophilized and resuspended in 1% formic acid at 200 fmol/μL concentration. For  
241 each MS analysis, 1 μL of sample was injected onto a 5 mm Thermo Trap C18 cartridge, and  
242 then separated over a 15 cm column packed with 1.9 μm Reprosil C18 particles (Dr. Maisch  
243 HPLC GmbH) by a nanoElute HPLC (Bruker). Separation was performed at 50 °C and a flow  
244 rate of 400 μL/min by the following gradient in 0.1% formic acid: 2% to 17% acetonitrile from 0  
245 to 20 min, followed by 17% to 28% acetonitrile from 20 to 40 min. The eluent was electrospray  
246 ionized into a Bruker timsTOF Pro mass spectrometer and data was collected using data-  
247 dependent PASEF acquisition. Database searching and extraction of MS1 peptide abundances  
248 was performed using the FragPipe platform with either trypsin or GluC enzyme specificity, and  
249 all peptide and protein identifications were filtered to a 1% false-discovery rate (60). Searches  
250 were performed against a concatenated protein database of the Spike protein, common  
251 contaminant proteins, and the *Saccharomyces cerevisiae* proteome (downloaded July 23,  
252 2020). Note, the *Saccharomyces cerevisiae* proteome was included to generate a sufficient  
253 population of true negative identifications for robust false discovery rate estimation of peptide  
254 and protein identifications. Lastly, the area under the curve MS1 intensities reported from  
255 FragPipe were summarized for each peptide species using MSstats (61).

256  
257 The peak areas of extracted ion chromatograms and associated side-chain modifications were  
258 used to quantify modification at each timepoint. Increasing beamline exposure time decreases  
259 the fraction of unmodified peptide and can be represented as a site-specific dose-response plot  
260 (Supplementary Fig. 5B). The rate of hydroxyl radical reactivity ( $k_{fp}$ ) is dependent on both the  
261 intrinsic reactivity of each residue and its solvent accessibility and was calculated by fitting the  
262 dose-response to a pseudo-first order reaction scheme in Graphpad Prism Version 8. The ratio  
263 of  $k_{fp}$  between apo Spike\* and the Spike-Nb3 complex at specific residues gave information on  
264 solvent accessibility changes between the two samples. These changes were mapped onto the  
265 SARS-CoV-2 Spike (PDB 6XR8) (11). In some cases, heavily modified residues show a  
266 flattening of dose-response at long exposures which we interpret as radical induced damage.  
267 These over-exposed timepoints were excluded from the calculation of  $k_{fp}$ .

268

269 **mNb6 crystallography and structure determination**



270 Purified mNb6 was concentrated to 18.7 mg/mL and filtered using 0.1 µm hydrophilic PVDF  
271 filters (Millipore). mNb6 crystal screens were set up in 96 well plates in hanging drop format at  
272 2:1 protein:reservoir in Index and AmSO4 screens (Hampton Research, Aliso Viejo, CA).  
273 Crystals in over 60 different screening conditions with various morphologies appeared overnight  
274 at ambient temperature and were obtained directly from the screens without further optimization.  
275 The crystals were cryoprotected by quick dipping in a solution containing 80% reservoir and  
276 20% PEG400 or 20% Glycerol, then mounted in CrystalCap HT Cryoloops (Hampton Research,  
277 Aliso Viejo, CA) and flash cooled in a cryogenic nitrogen stream (100 K). All data were collected  
278 at the Advanced Light Source (Berkeley, CA) beam line 8.3.1. A single crystal of mNb6 that  
279 grew in 0.1 M Tris.HCl pH 8.5, 1.0 M Ammonium sulfate diffracted to 2.05 Å. Integration, and  
280 scaling were performed with Xia2, using XDS for indexing and integration and XSCALE for  
281 scaling and merging (62). The structure was solved molecular replacement using PHASER  
282 using the structure of nanobody, Nb.b201 (PDB 5VNV) as search model (46, 63). Model  
283 building was performed with COOT and refined with PHENIX and BUSTER(55, 57, 64).

284

#### 285 **Pseudovirus assays for nanobody neutralization**

286 ZsGreen SARS-CoV-2-pseudotyped lentivirus was generated according to a published protocol  
287 (20). The day before transduction, 50,000 ACE2 expressing HEK293T cells were plated in each  
288 well of a 24-well plate. 10-fold serial dilutions of nanobody were generated in complete medium  
289 (DMEM + 10% FBS + PSG) and pseudotyped virus was added to a final volume of 200 µL.  
290 Media was replaced with nanobody/pseudotyped virus mixture for four hours, then removed.  
291 Cells were washed with complete medium and then incubated in complete medium at 37 °C.  
292 Three days post-transduction, cells were trypsinized and the proportion of ZsGreen+ cells was  
293 measured on an Attune flow cytometer (ThermoFisher).

294

#### 295 **Authentic SARS-CoV-2 neutralization assay**

296 SARS-CoV-2, isolate France/IDF0372/2020, was supplied by the National Reference Centre for  
297 Respiratory Viruses hosted by Institut Pasteur (Paris, France) and headed by Pr. Sylvie van der  
298 Werf. Viral stocks were prepared by propagation in Vero E6 cells in Dulbecco's modified Eagle's  
299 medium (DMEM) supplemented with 2% (v/v) fetal bovine serum (FBS, Invitrogen). Viral titers  
300 were determined by plaque assay. All plaque assays involving live SARS-CoV-2 were  
301 performed at Institut Pasteur Paris (IPP) in compliance with IPP's guidelines following Biosafety  
302 Level 3 (BSL-3) containment procedures in approved laboratories. All experiments were  
303 performed in at least three biologically independent samples.

304  
305 Neutralization of infectious SARS-CoV-2 was performed using a plaque reduction neutralization  
306 test in Vero E6 cells (CRL-1586, ATCC). Briefly, nanobodies (or ACE2-Fc) were eight-fold  
307 serially diluted in DMEM containing 2% (v/v) FBS and mixed with 50 plaque forming units (PFU)  
308 of SARS-CoV-2 for one hour at 37°C, 5% CO<sub>2</sub>. The mixture was then used to inoculate Vero E6  
309 cells seeded in 12-well plates, for one hour at 37 °C, 5% CO<sub>2</sub>. Following this virus adsorption  
310 time, a solid agarose overlay (DMEM, 10% (v/v) FBS and 0.8% agarose) was added. The cells  
311 were incubated for a further 3 days prior to fixation using 4% formalin and plaques visualized by  
312 the addition of crystal violet. The number of plaques in quadruplicate wells for each dilution was  
313 used to determine the half maximal inhibitory concentrations (IC<sub>50</sub>) using 3-parameter logistic  
314 regression (GraphPad Prism version 8).

315

### 316 **Nanobody stability studies**

317 Nanobody thermostability by circular dichroism was assessed using a Jasco J710 CD  
318 spectrometer equipped with a Peltier temperature control. Individual nanobody constructs were  
319 diluted to 5 µM in phosphate buffered saline. Molar ellipticity was measured at 204 nm (2 nm  
320 bandwidth) between 25 °C and 80 °C with a 1 °C/min heating rate. The resulting molar ellipticity  
321 values were normalized and plotted in GraphPad Prism 8.0 after applying a nearest neighbor  
322 smoothing function.

323

324 For nanobody competition experiments on ACE2 expressing HEK293T cells, nanobodies were  
325 incubated at either 25°C or 50°C for one hour. Alternatively, each nanobody was aerosolized  
326 with a portable mesh nebulizer producing 2-5 µm particles at a final concentration of 0.5 mg/mL.  
327 The resulting aerosol was collected by condensation into a 50 mL tube cooled on ice. Samples  
328 were then treated as indicated above to determine IC<sub>50</sub> values for binding to Spike\*-Alexa647.

329

330 Further experiments assessing mNb6 and mNb6-tri stability to aerosolization and lyophilization  
331 used a starting concentration of 0.5 mg/mL of each construct. Aerosolization was performed as  
332 described above. For lyophilization, nanobodies were first flash frozen in liquid nitrogen and the  
333 solution was dried to completion under vacuum. The resulting dried material was resuspended  
334 in 20 mM HEPES pH 7.5, 150 mM NaCl. Size exclusion chromatography of the unstressed,  
335 post-aerosolization, and post-lyophilization samples were performed on a Superdex 75 Increase  
336 10/300 column in 20 mM HEPES pH 7.5, 150 mM NaCl. SPR experiments to assess binding to  
337 Spike\* were performed as described above.

338

339

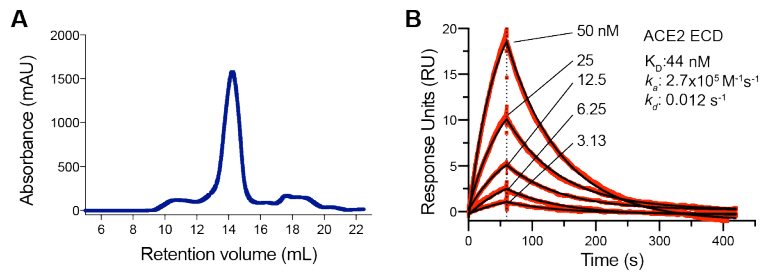

340

341

342

343

**Supplementary Fig. 1. Validation of purified Spike\*.** **A**, Size exclusion chromatogram of purified Spike\* from ExpiCHO cells. **B**, SPR of immobilized Spike\* binding to monomeric ACE2 extracellular domain (ECD).

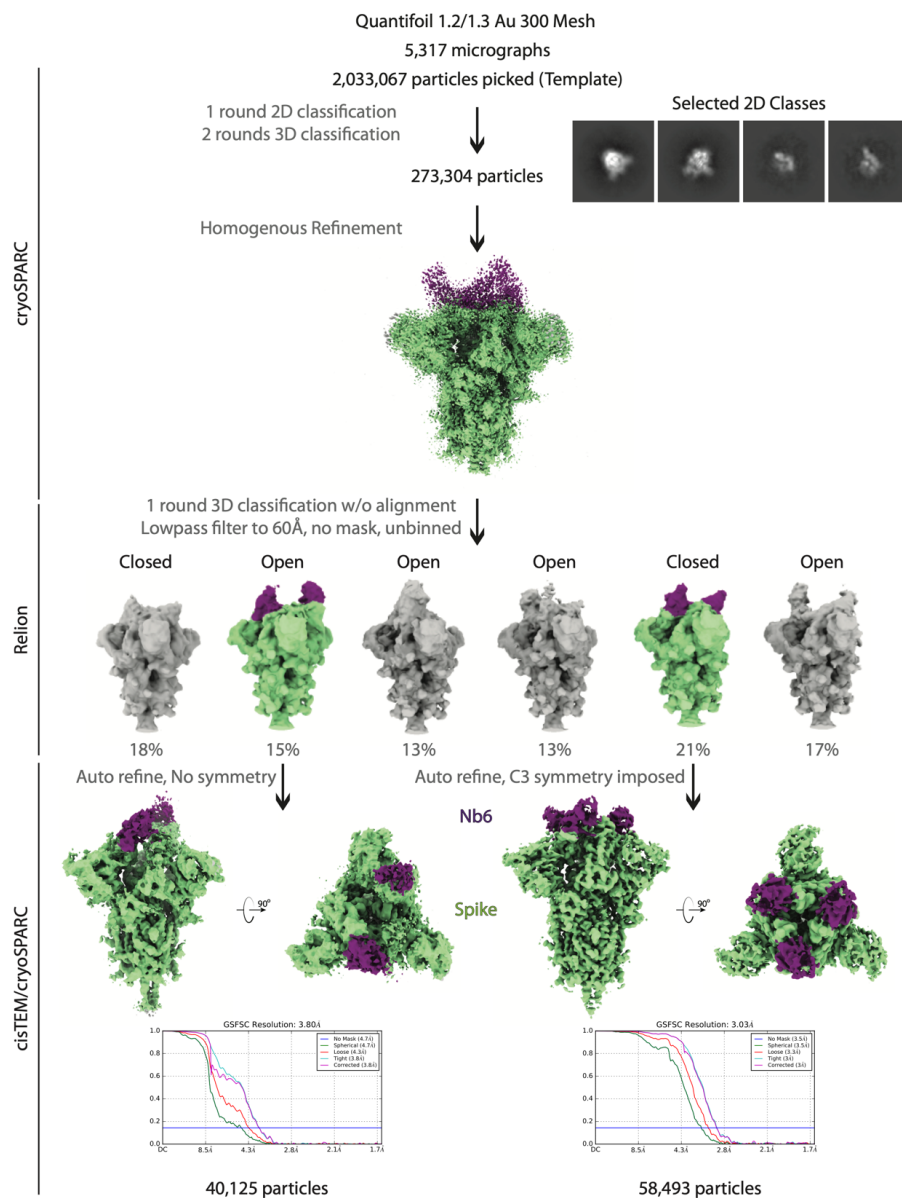

344

345 **Supplementary Fig. 2. Cryo-EM workflow for Nb6**

346 A flowchart representation of the classification workflow for Spike\*-Nb6 complexes yielding open  
 347 and closed Spike\* conformations. From top to bottom, particles were template picked with a set  
 348 of 20 Å low-pass filtered 2D backprojections of apo-Spike\* in the closed conformation. Extracted  
 349 particles in 2D classes suggestive of various Spike\* views were subject to a round of  
 350 heterogenous refinement 3 in cryoSPARC with two naïve classes generated from a truncated *Ab*  
 351 *initio* job, and a 20 Å low-pass filtered volume of apo-Spike\* in the closed conformation.  
 352 Particles in the Spike\* 3D class were subject to 25 iterations of 3D classification into 6 classes  
 353 without alignment in RELION, using the same input volume from cryoSPARC 3D classification,

354 low pass filtered to 60 Å, T = 8. Particles in classes representing the open and closed Spike\*  
355 conformations were imported into cisTEM for automatic refinement. Half maps from refinement  
356 were imported into cryoSPARC for local resolution estimation as shown in Supplementary Fig.  
357 4.

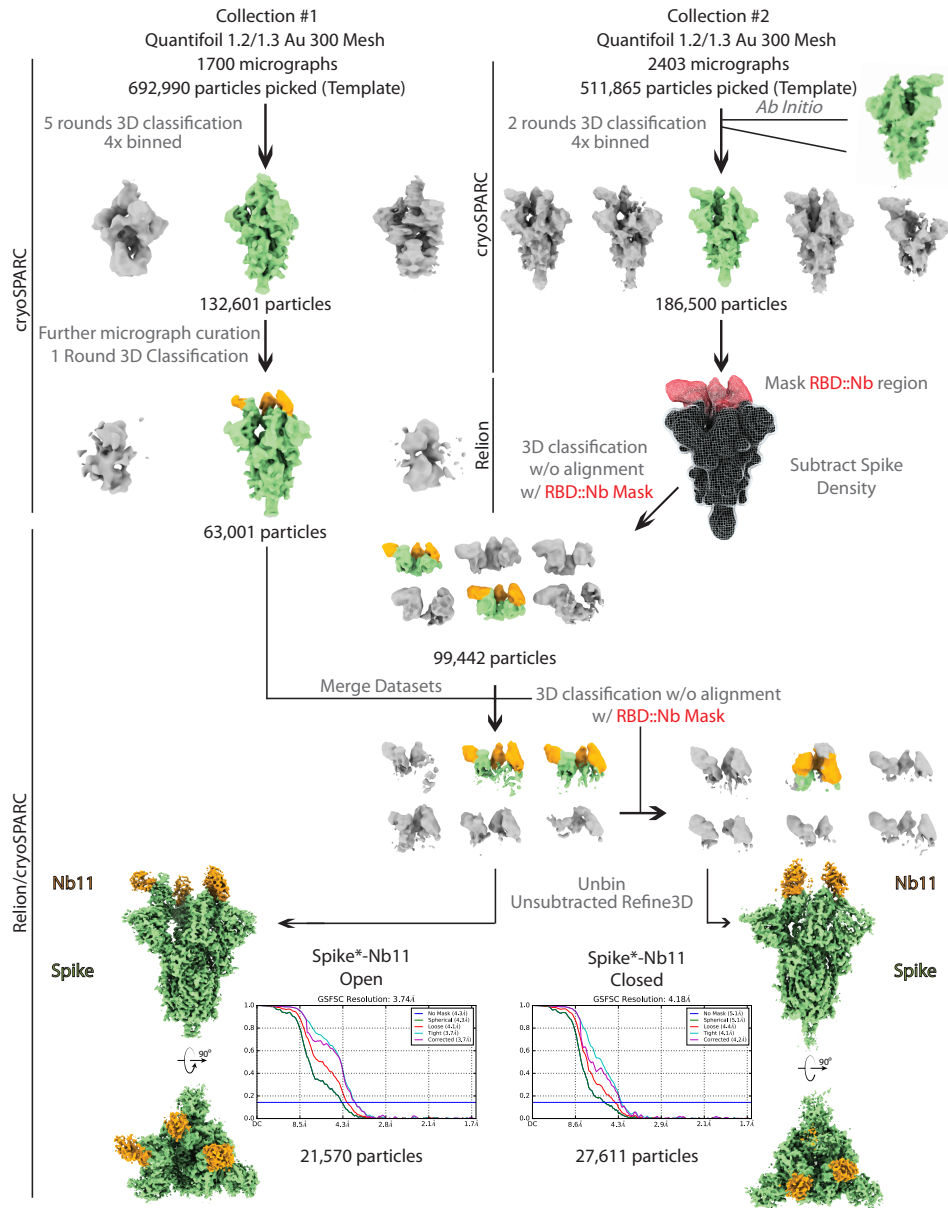

358

359 **Supplementary Fig. 3. Cryo-EM workflow for Nb11**

360 A flowchart representation of the classification workflow for Spike\*-Nb11 complexes yielding  
 361 open and closed Spike\* conformations. From top to bottom, particles were template picked from  
 362 two separate collections with a set of 20 Å low-pass filtered 2D backprojections of apo-Spike\* in  
 363 the closed conformation. Extracted particles were Fourier cropped to 128 pixels prior to  
 364 extensive heterogeneous refinement in cryoSPARC, using a 20 Å low-pass filtered volume of  
 365 apo-Spike\* in the closed conformation and additional naïve classes for removal of non-Spike\*  
 366 particles. After cryoSPARC micrograph curation and heterogeneous refinement, Spike\* density  
 367 corresponding to all regions outside of the ACE2 RBD::Nanobody interface were subtracted. A

368 mask around the ACE2 RBD::Nanobody interface was generated, and used for multiple rounds  
369 of 3D classification without alignment in RELION. Particles in classes representing open and  
370 closed Spike\* conformations were selected, unsorted and unbinned prior to refinement in  
371 RELION. Half maps from refinement were imported into cryoSPARC for local resolution  
372 estimation as shown in Supplementary Fig. 4.

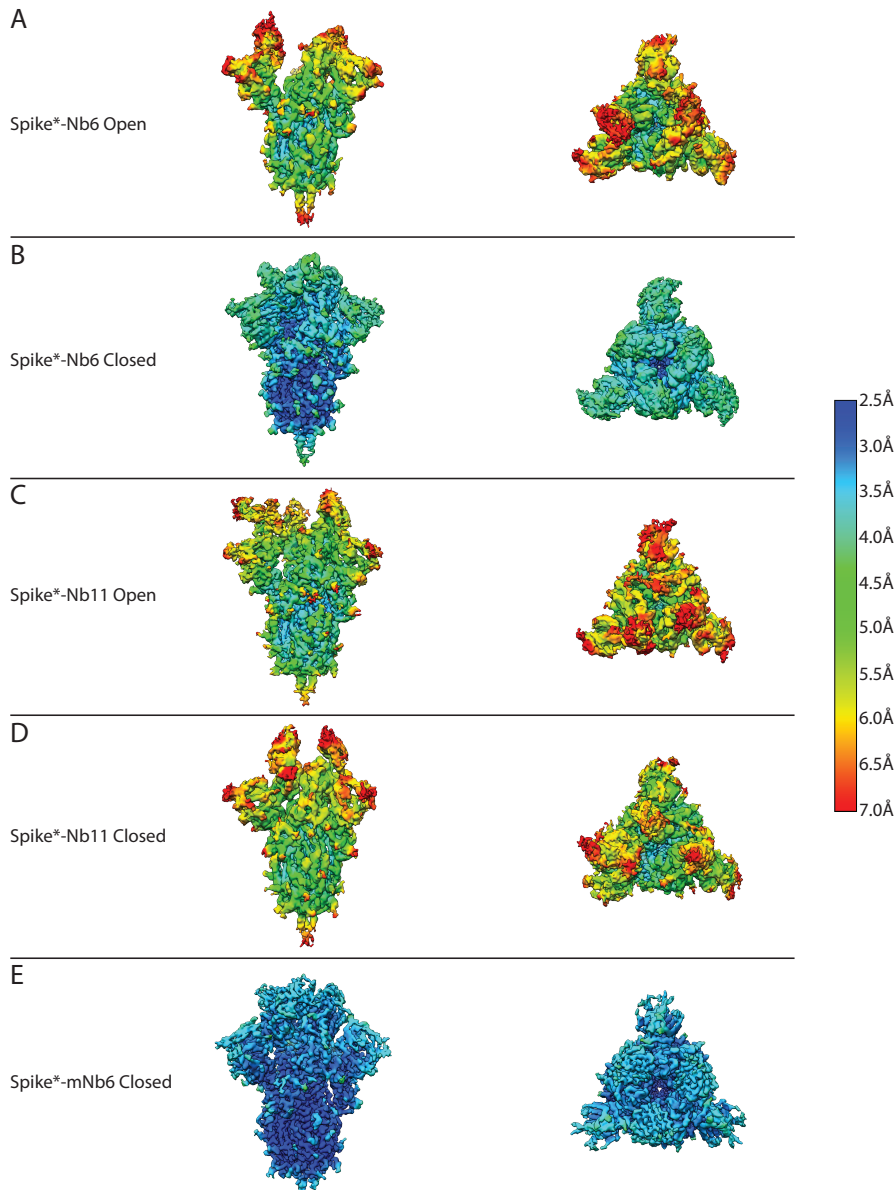

373

374 **Supplementary Fig. 4. Local resolution of cryo-EM maps**

375 Local resolution estimates of Spike\* complexes with A-B) Nb6, C-D) Nb11, and E) mNb6 as  
 376 generated in cryoSPARC. All maps (except mNb6) are shown with the same enclosed volume.

377 All maps are colored on the same scale, as indicated.



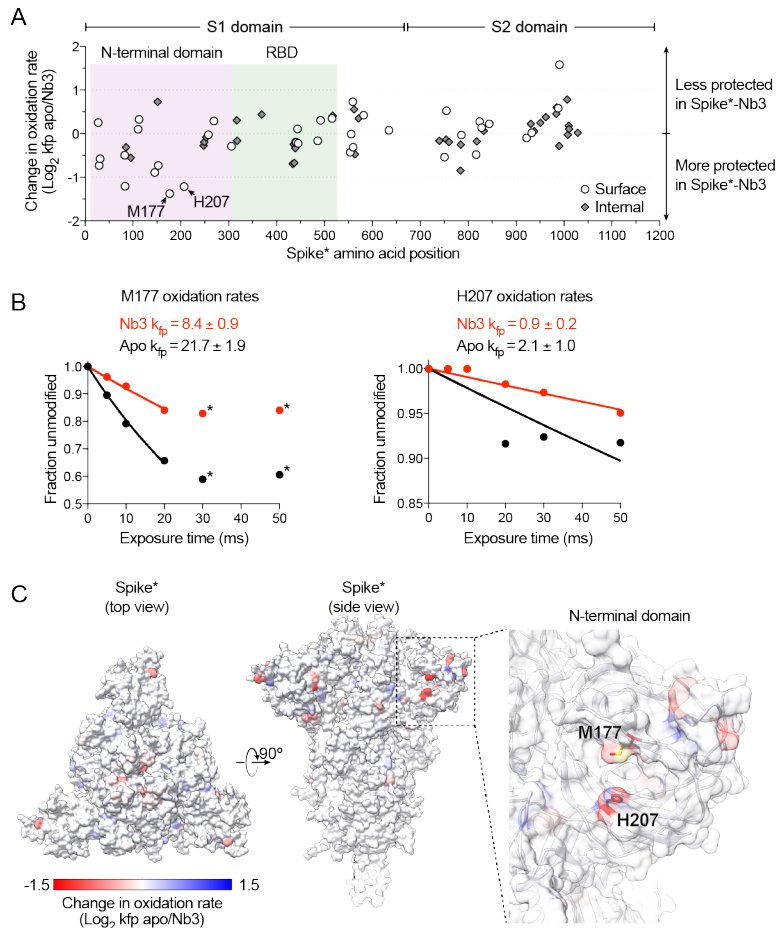

378

379 **Supplementary Fig. 5. Radiolytic hydroxyl radical footprinting of Spike\*.**

380 **A**, Change in oxidation rate between Spike\* and Nb3-Spike\* complexes at all residues. A  
 381 cluster of highly protected residues in the Spike\*-Nb3 complex is observed in the N-terminal  
 382 domain. **B**, Oxidation rate plots of the two (M177, H207) most heavily protected residues upon  
 383 Nb3 binding to Spike\*. Data points labeled with an asterisk are excluded from rate calculations  
 384 as these values fall outside of the first order reaction, likely due to extensive oxidation-mediated  
 385 damage. **C**, Change in oxidation rate mapped onto Spike in the all RBD down conformation.

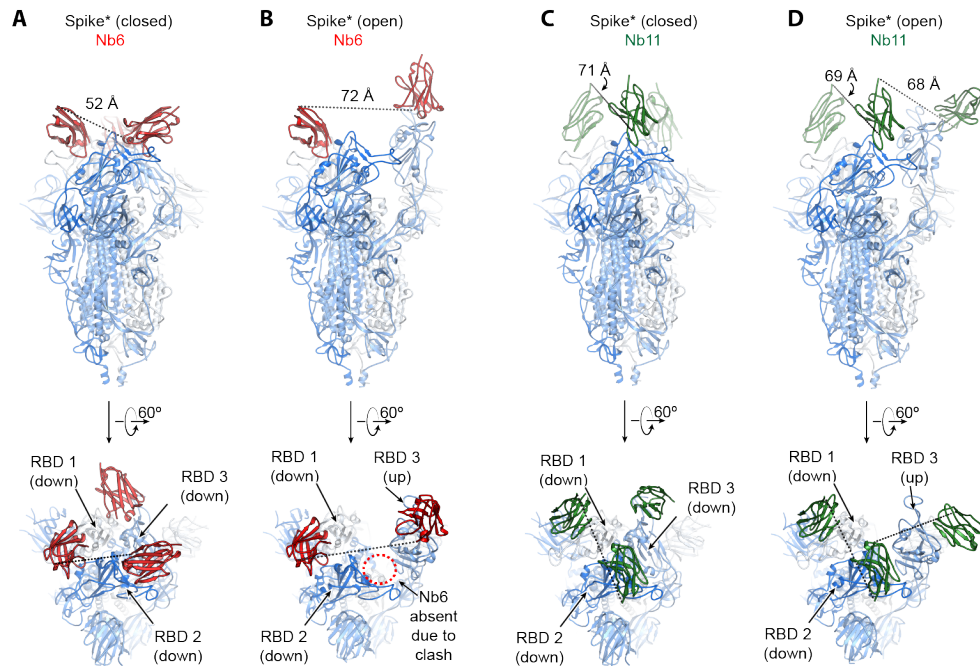

386

387

388 **Supplementary Fig. 6. Modeling of distances for multimeric nanobody design.** **A**, Model of  
 389 Spike\*:Nb6 complex in the closed state. The minimal distance between adjacent Nb6 N- and C-  
 390 termini is 52 Å (dashed line). **B**, Model of Spike\*:Nb6 complex in the open state with Nb6  
 391 docked into the cryo-EM density for up-state RBD. Minimal distance between N- and C-termini  
 392 of both nanobodies is 72 Å. Nb6 cannot bind RBD2 in open Spike\*, as this would sterically clash  
 393 with RBD3. **C**, Model of Spike\*:Nb11 complex in the closed state. The minimal distance  
 394 between adjacent Nb6 N- and C-termini is 71 Å (dashed line). **D**, Model of Spike\*:Nb11 complex  
 395 in the open state. The minimal distance between adjacent Nb6 N- and C-termini is 68 Å  
 396 between Nb11 bound to RBD2 in the down-state and RBD3 in the up-state. For B, the model of  
 397 Nb6 from A was docked into the cryo-EM map to enable modeling of distance between N- and  
 398 C-termini. For C and D, a generic nanobody was docked into cryo-EM maps to model the  
 399 distance between N- and C-termini.

400

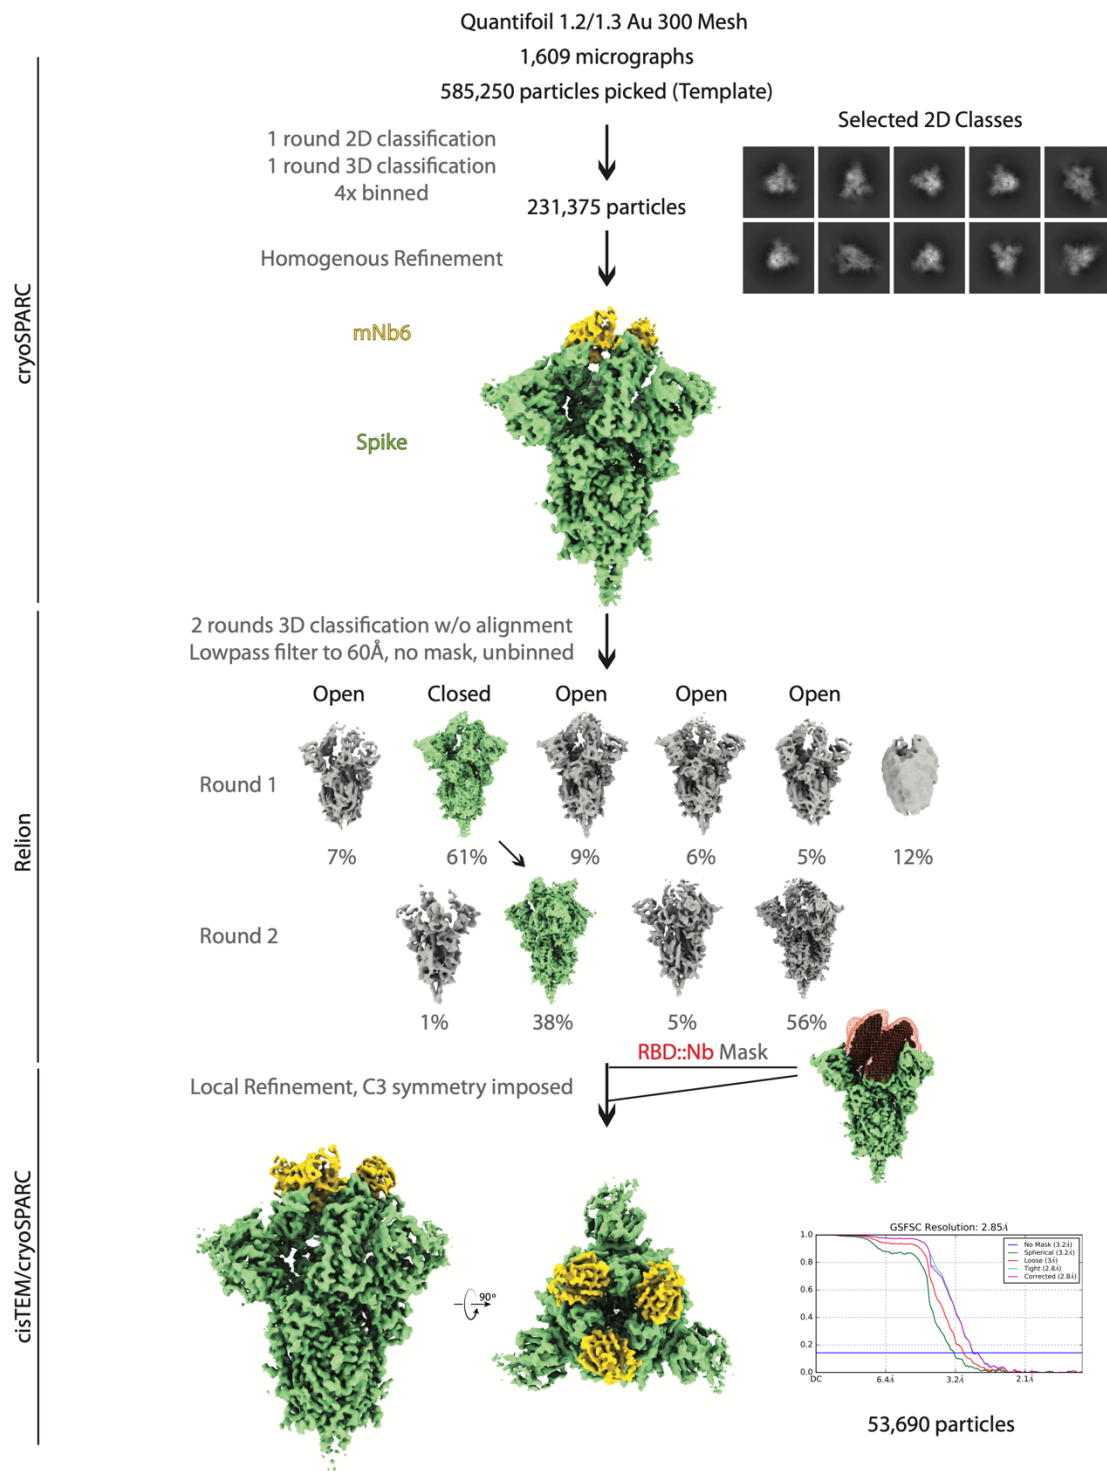

401  
402 **Supplementary Fig. 7. CryoEM workflow for mNb6**  
403 A flowchart representation of the classification workflow for the Spike\*-mNb6 complex yielding a  
404 closed Spike\* conformation. From top to bottom, particles were template picked from two  
405 separate collections with a set of 20Å low-pass filtered 2D backprojections of apo-Spike\* in the

406 closed conformation. Extracted particles were Fourier cropped to 96 pixels prior to 2D  
407 classification. Particles in Spike\* 2D classes were selected for a round of heterogeneous  
408 refinement in cryoSPARC using a 20 Å low-pass filtered volume of apo-Spike\* in the closed  
409 conformation and additional naïve classes for removal of non-Spike\* particles. In RELION,  
410 particles in the Spike\* 3D class were subject to two rounds of 3D classification without  
411 alignment into 6 classes using the same input volume from cryoSPARC 3D classification, low  
412 pass filtered to 60 Å, T = 8. Unbinned particles in the Spike\*-closed conformation were exported  
413 into cisTEM for automatic refinement, followed by local refinement using a mask around the  
414 ACE2 RBD::Nanobody interface. Half maps from refinement were imported into cryoSPARC for  
415 local resolution estimation as shown in Supplementary Fig. 4.

416

417

418 **Supplementary Table 1. CryoEM datasets**

| Sample:<br>Spike* conformation:<br>EMDB:<br>PDB: | Spike*-Nb6                                               |          | Spike*-Nb11 |          | Spike*-mNb6 |
|--------------------------------------------------|----------------------------------------------------------|----------|-------------|----------|-------------|
|                                                  | Open                                                     | Closed   | Open        | Closed   | Closed      |
|                                                  | XXXX                                                     | XXXX     | XXXX        | XXXX     | XXXX        |
| <b>Data collection and processing</b>            | Titan Krios/Gatan K3 with Gatan Bioquantum Energy Filter |          |             |          |             |
| Microscope/Detector                              | SerialEM, 3x3 image shift                                |          |             |          |             |
| Imaging software and collection                  | 105,000                                                  |          |             |          |             |
| Magnification                                    | 300                                                      |          |             |          |             |
| Voltage (kV)                                     | 66                                                       |          |             |          |             |
| Electron exposure (e-/Å <sup>2</sup> )           | 8                                                        |          |             |          |             |
| Dose rate (e-/pix/sec)                           | 0.55                                                     |          |             |          |             |
| Frame exposure (e-/Å <sup>2</sup> )              | -0.8 to -2.0                                             |          |             |          |             |
| Defocus range (µm)                               | 0.834 (physical)                                         |          |             |          |             |
| Pixel size (Å)                                   |                                                          |          |             |          |             |
| Micrographs                                      | 5,317                                                    |          | 4,103       |          | 1,609       |
| <b>Reconstruction</b>                            | 2,033,067                                                |          | 1,204,855   |          | 585,250     |
| Autopicked particles                             |                                                          |          |             |          |             |
| (template-based in cryosparc)                    |                                                          |          |             |          |             |
| Particles in final refinement                    | 40,125                                                   | 58,493   | 21,570      | 27,611   | 53,690      |
|                                                  | (cisTEM)                                                 | (cisTEM) | (cisTEM)    | (RELION) | (cisTEM)    |
| Symmetry imposed                                 | C1                                                       | C3       | C1          | C1       | C3          |
| Map sharpening B factor (Å <sup>2</sup> )        |                                                          | -90      |             |          | -140        |
| Map resolution, global FSC (Å)                   |                                                          |          |             |          |             |
| FSC 0.5, unmasked/masked                         | 7.8/4.6                                                  | 4.1/3.4  | 7.0/4.4     | 7.6/5.3  | 3.9/3.3     |
| FSC 0.143, unmasked/masked                       | 4.7/3.8                                                  | 3.5/3.0  | 4.3/3.7     | 5.1/4.2  | 3.2/2.9     |
| <b>Refinement</b>                                |                                                          |          |             |          |             |
| Initial model used (PDB code)                    | 6VXX, 3P0G                                               |          |             |          | 6VXX, 3P0G  |
| Model resolution (Å)                             |                                                          |          |             |          |             |
| FSC 0.5, unmasked/masked                         | 3.5/3.1                                                  |          |             |          | 3.2/2.9     |
| Model composition                                |                                                          |          |             |          |             |
| Non-hydrogen atoms                               | 26904                                                    |          |             |          | 27015       |
| Protein residues                                 | 3360                                                     |          |             |          | 3360        |
| B factors (Å <sup>2</sup> )                      |                                                          |          |             |          |             |
| Protein                                          | 97.0                                                     |          |             |          | 57.5        |
| Ligand                                           | 107.4                                                    |          |             |          | 85.7        |
| R.m.s. deviations                                |                                                          |          |             |          |             |
| Bond lengths (Å)                                 | 0.014                                                    |          |             |          | 0.007       |
| Bond angles (°)                                  | 1.379                                                    |          |             |          | 1.027       |
| Validation                                       |                                                          |          |             |          |             |
| MolProbity score                                 | 1.99                                                     |          |             |          | 1.71        |
| Clashscore                                       | 12.70                                                    |          |             |          | 6.46        |
| Poor rotamers (%)                                | 0.45                                                     |          |             |          | 0.41        |
| EMRinger score                                   | 2.98                                                     |          |             |          | 4.01        |
| CaBLAM score                                     | 3.11                                                     |          |             |          | 2.95        |
| Ramachandran plot                                |                                                          |          |             |          |             |
| Favored (%)                                      | 94.49                                                    |          |             |          | 94.92       |
| Allowed (%)                                      | 5.51                                                     |          |             |          | 5.08        |
| Disallowed (%)                                   | 0                                                        |          |             |          | 0           |

419

420

421 **Supplementary Table 2. X-ray data collection and refinement statistics**

|                                         | mNb6<br>(PDB XXXX)                      |
|-----------------------------------------|-----------------------------------------|
| <b>Data collection</b>                  |                                         |
| Space group                             | $P2_1$                                  |
| Cell dimensions                         |                                         |
| <i>a</i> , <i>b</i> , <i>c</i> (Å)      | 44.56, 71.25, 46.43                     |
| $\alpha$ , $\beta$ , $\gamma$ (°)       | 90.0, 114.93, 90.0                      |
| Molecules in asymmetric unit            | 2                                       |
| Resolution (Å)                          | 71.25 - 2.05 (2.09 - 2.05) <sup>a</sup> |
| $R_{\text{sym}}$ or $R_{\text{merge}}$  | 0.13 (0.94) <sup>b</sup>                |
| $I / \sigma I$                          | 7.2 (0.9)                               |
| Completeness (%)                        | 97.8 (96.6)                             |
| Redundancy                              | 6.4 (5.7)                               |
| CC (1/2) (%)                            | 99.8 (64.4)                             |
| <b>Refinement</b>                       |                                         |
| Resolution (Å)                          | 71.25 – 2.05                            |
| No. reflections                         | 104195                                  |
| $R_{\text{work}} / R_{\text{free}}$ (%) | 21.16 / 24.75                           |
| No. atoms                               |                                         |
| Protein                                 | 1798                                    |
| Ligand/ion                              | 21                                      |
| Water                                   | 131                                     |
| <i>B</i> -factors                       |                                         |
| Protein                                 | 33.1                                    |
| Ligand/ion                              | 76.1                                    |
| Water                                   | 42.2                                    |
| R.m.s. deviations                       |                                         |
| Bond lengths (Å)                        | 0.07                                    |
| Bond angles (°)                         | 0.826                                   |
| Ramachandran plot                       |                                         |
| Allowed (%)                             | 99.06                                   |
| Generous (%)                            | 0.94                                    |
| Disallowed (%)                          | 0                                       |

422 <sup>a</sup> Values in parentheses correspond to the highest resolution shell.423 <sup>b</sup>  $R_{\text{merge}} = \sum |I - \langle I \rangle| / \sum I$

424  
425

**Supplementary Table 3. Nanobody expression plasmids**

| Plasmid | Nanobody                              | Plasmid backbone | Resistance Marker |
|---------|---------------------------------------|------------------|-------------------|
| pPW3544 | Nb2                                   | pet-26b(+)       | kanamycin         |
| pPW3545 | Nb3                                   | pet-26b(+)       | kanamycin         |
| pPW3546 | Nb6                                   | pet-26b(+)       | kanamycin         |
| pPW3547 | Nb8                                   | pet-26b(+)       | kanamycin         |
| pPW3548 | Nb11                                  | pet-26b(+)       | kanamycin         |
| pPW3549 | Nb12                                  | pet-26b(+)       | kanamycin         |
| pPW3550 | Nb15                                  | pet-26b(+)       | kanamycin         |
| pPW3551 | Nb16                                  | pet-26b(+)       | kanamycin         |
| pPW3552 | Nb17                                  | pet-26b(+)       | kanamycin         |
| pPW3553 | Nb18                                  | pet-26b(+)       | kanamycin         |
| pPW3554 | Nb19                                  | pet-26b(+)       | kanamycin         |
| pPW3555 | Nb24                                  | pet-26b(+)       | kanamycin         |
| pPW3557 | Trivalent Nb6, 20AA length GS linker  | pet-26b(+)       | kanamycin         |
| pPW3558 | Trivalent Nb3, 15AA length GS linker  | pet-26b(+)       | kanamycin         |
| pPW3559 | Trivalent Nb11, 15AA length GS linker | pet-26b(+)       | kanamycin         |
| pPW3560 | Bivalent Nb3, 15AA length GS linker   | pet-26b(+)       | kanamycin         |
| pPW3561 | Bivalent Nb6, 15AA length GS linker   | pet-26b(+)       | kanamycin         |
| pPW3563 | Trivalent mNb6, 20AA length GS linker | pet-26b(+)       | kanamycin         |
| pPW3564 | mNb6                                  | pet-26b(+)       | kanamycin         |

426  
427  
428

429 **QCRG STRUCTURAL BIOLOGY CONSORTIUM AUTHORS**

430 In addition to those listed explicitly in the author contributions, the structural biology portion of  
431 this work was performed by the QCRG (Quantitative Biosciences  
432 Institute Coronavirus Research Group) Structural Biology Consortium. Listed below are the  
433 contributing members of the consortium listed by teams in order of team relevance to the  
434 published work. Within each team the team leads are italicized (responsible for organization of  
435 each team, and for the experimental design utilized within each team), then the rest of team  
436 members are listed alphabetically. CryoEM grid freezing/collection team: *Caleigh M. Azumaya,*  
437 *Cristina Puchades, Ming Sun,* Julian R. Braxton, Axel F. Brilot, Meghna Gupta, Fei Li, Kyle E.  
438 Lopez, Arthur Melo, Gregory E. Merz, Frank Moss, Joana Paulino, Thomas H. Pospiech,  
439 Jr., Sergei Pourmal, Alexandra N. Rizo, Amber M. Smith, Paul V. Thomas, Feng Wang, Zanlin  
440 Yu. CryoEM data processing team: *Miles Sasha Dickinson, Henry C. Nguyen,* Daniel Asarnow,  
441 Julian R. Braxton, Melody G. Campbell, Cynthia M. Chio, Un Seng Chio, Devan Diwanji, Bryan  
442 Faust, Meghna Gupta, Nick Hoppe, Mingliang Jin, Fei Li, Junrui Li, Yanxin Liu, Gregory E.  
443 Merz, Joana Paulino, Thomas H. Pospiech, Jr., Sergei Pourmal, Smriti Sangwan, Tsz Kin  
444 Martin Tsui, Raphael Trenker, Donovan Trinidad, Eric Tse, Kaihua Zhang, Fengbo  
445 Zhou. Crystallography team: *Nadia Herrera, Huong T. Kratochvil, Ursula Schulze-*  
446 *Gahmen, Michael C. Thompson, Iris D. Young,* Justin Biel, Ishan Deshpande, Xi  
447 Liu. Mammalian cell expression team: *Christian Bache Billesbølle, Melody G. Campbell, Devan*  
448 *Diwanji, Carlos Nowotny, Amber M. Smith, Jianhua Zhao,* Caleigh M. Azumaya, Alisa Bowen,  
449 Nick Hoppe, Yen-Li Li, Phuong Nguyen, Cristina Puchades, Mali Safari, Smriti Sangwan, Kaitlin  
450 Schaefer, Raphael Trenker, Tsz Kin Martin Tsui, Natalie Whitis. Protein purification team: *Daniel*  
451 *Asarnow, Michelle Moritz, Tristan W. Owens, Sergei Pourmal,* Caleigh M. Azumaya, Cynthia M.  
452 Chio, Amy Diallo, Bryan Faust, Meghna Gupta, Kate Kim, Joana Paulino, Jessica K. Peters,  
453 Kaitlin Schaefer, Tsz Kin Martin Tsui. Bacterial expression team: *Amy Diallo, Meghna*  
454 *Gupta, Erron W. Titus,* Jenny Chen, Loan Doan, Sebastian Flores, Mingliang Jin, Huong T.  
455 Kratochvil, Victor L. Lam, Yang Li, Megan Lo, Gregory E. Merz, Joana Paulino, Aye C.  
456 Thwin, Stephanie Wankowicz, Zanlin Yu, Yang Zhang, Fengbo Zhou. Infrastructure team: *David*  
457 *Bulkley, Arceli Joves, Almarie Joves, Liam McKay, Mariano Tabios, Eric Tse.* Leadership team:  
458 *Oren S Rosenberg, Kliment A Verba,* David A Agard, Yifan Cheng, James S Fraser, Adam  
459 Frost, Natalia Jura, Tanja Kortemme, Nevan J Krogan, Aashish Manglik, Daniel R. Southworth,  
460 Robert M Stroud. The QCRG Structural Biology Consortium has received support from:  
461 Quantitative Biosciences Institute, Defense Advanced Research Projects Agency HR0011-19-2-  
462 0020 (to D.A.Agard and K.A.Verba; B. Shoichet PI), FastGrants COVID19 grant (K.A.Verba PI),



463 Laboratory For Genomics Research (O.S.Rosenberg PI) and Laboratory for Genomics  
464 Research LGR-ERA (R.M.Stroud PI). R.M.Stroud is supported by NIH grants AI 50476,  
465 GM24485.
